# Supplementary material
Source: PubMed Central journal article supplement (PMC3338931)
Supplement: hv0712_1326SD1.pdf [file hv0712_1326SD1.pdf]

## Supplementary Figure 1

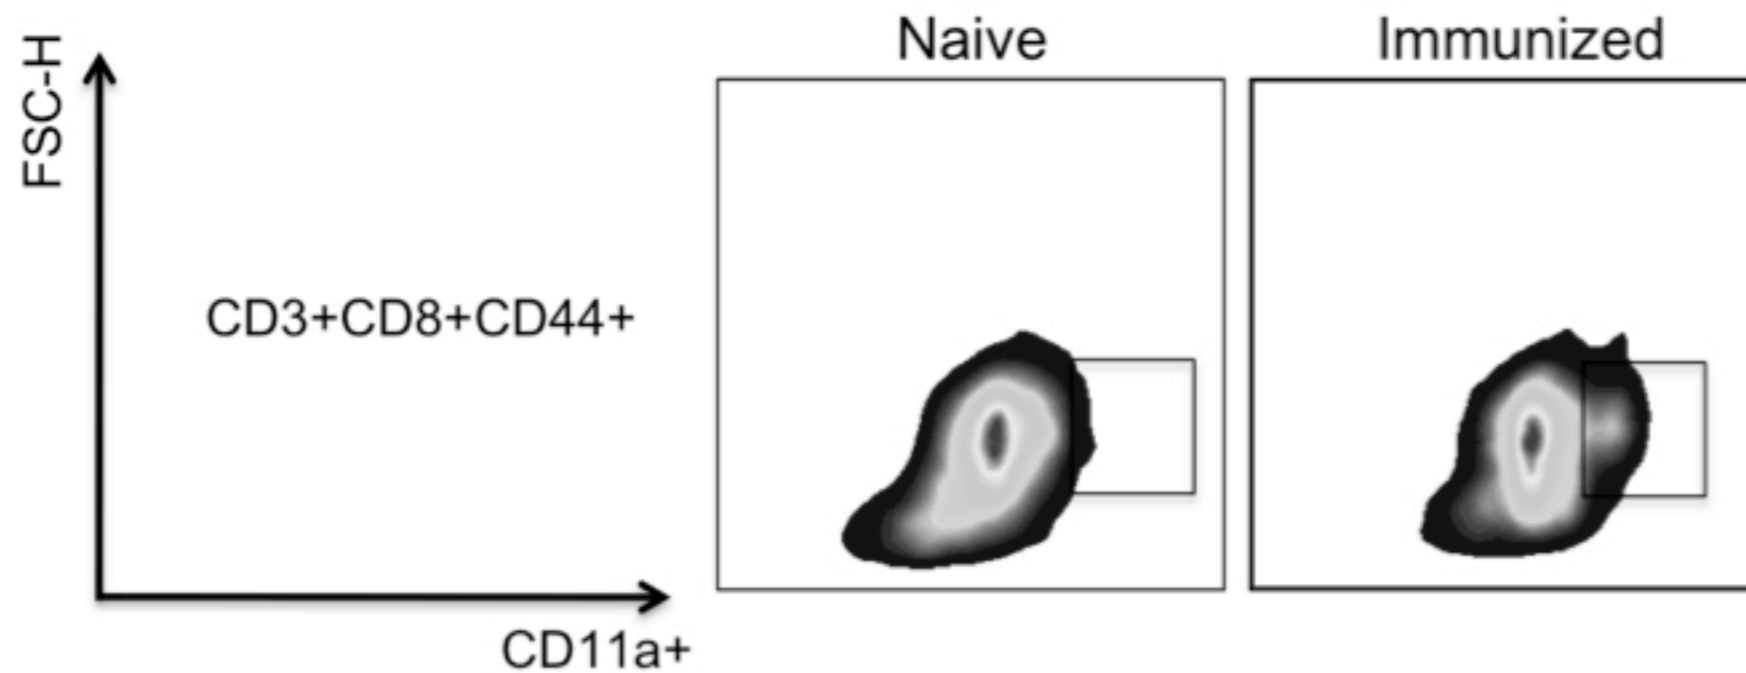

**Figure S1.** HCV-specific effector CD8<sup>+</sup> T cells. Representative HCV NS3-specific CD8<sup>+</sup> effector T-cell staining in both the naïve and immunized group. HCV NS3-specific CD8<sup>+</sup> effector T cells were defined as positive staining for CD3, CD8, CD11a and CD44.

## Supplementary Figure 2

Figure S2. CCR5+ and CXCR3+ expression on HCV NS3-specific CD8+ T cells. (A) Percentage of CCR5+ CD8+ CD107A+ IFN- $\gamma$ - or CCR5+ CD8+ CD107A+ IFN- $\gamma$ + T cells present within the spleen as compared with the liver. (B) Percentage of CXCR3+ CD8+ CD107A+ IFN- $\gamma$ - or CXCR3+ CD8+ CD107A+ IFN- $\gamma$ + T cells present within the spleen as compared with the liver. Significance was determined by Student's t-test (\* $p < 0.05$ , \*\* $p < 0.005$  and \*\*\* $p < 0.0005$ , NS = Not Significant). (n = 5)

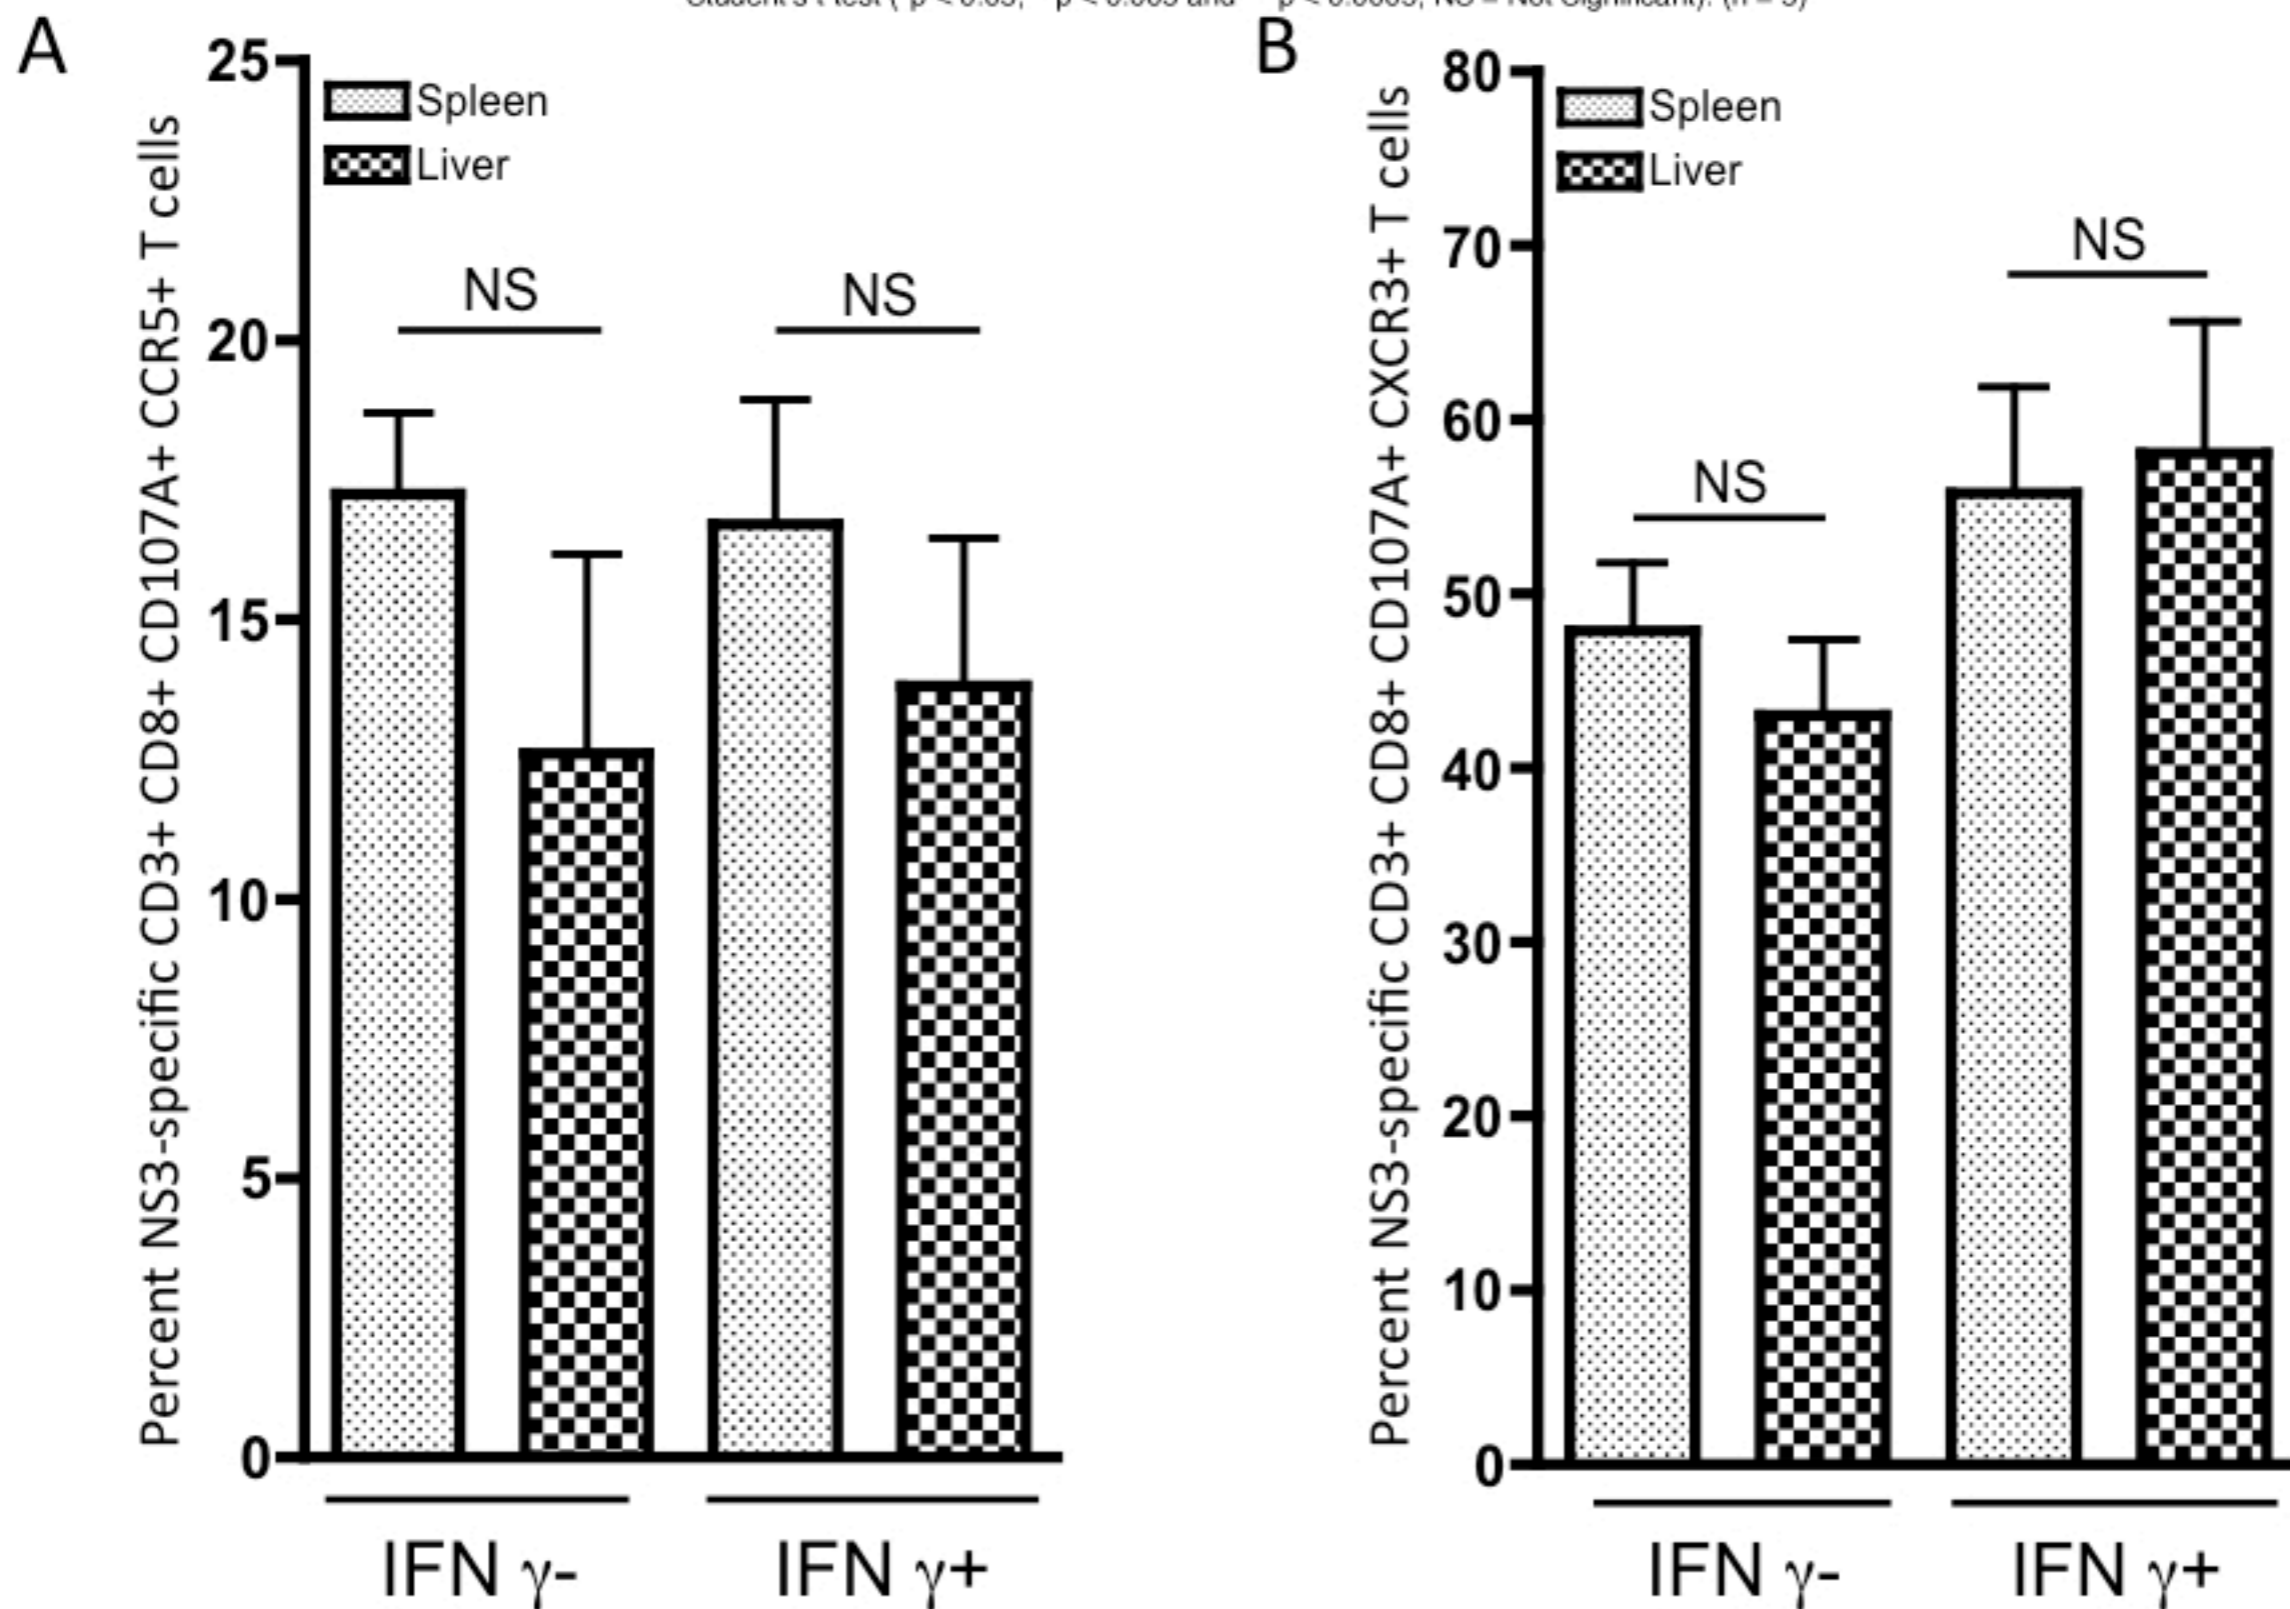

Supplementary Figure 3

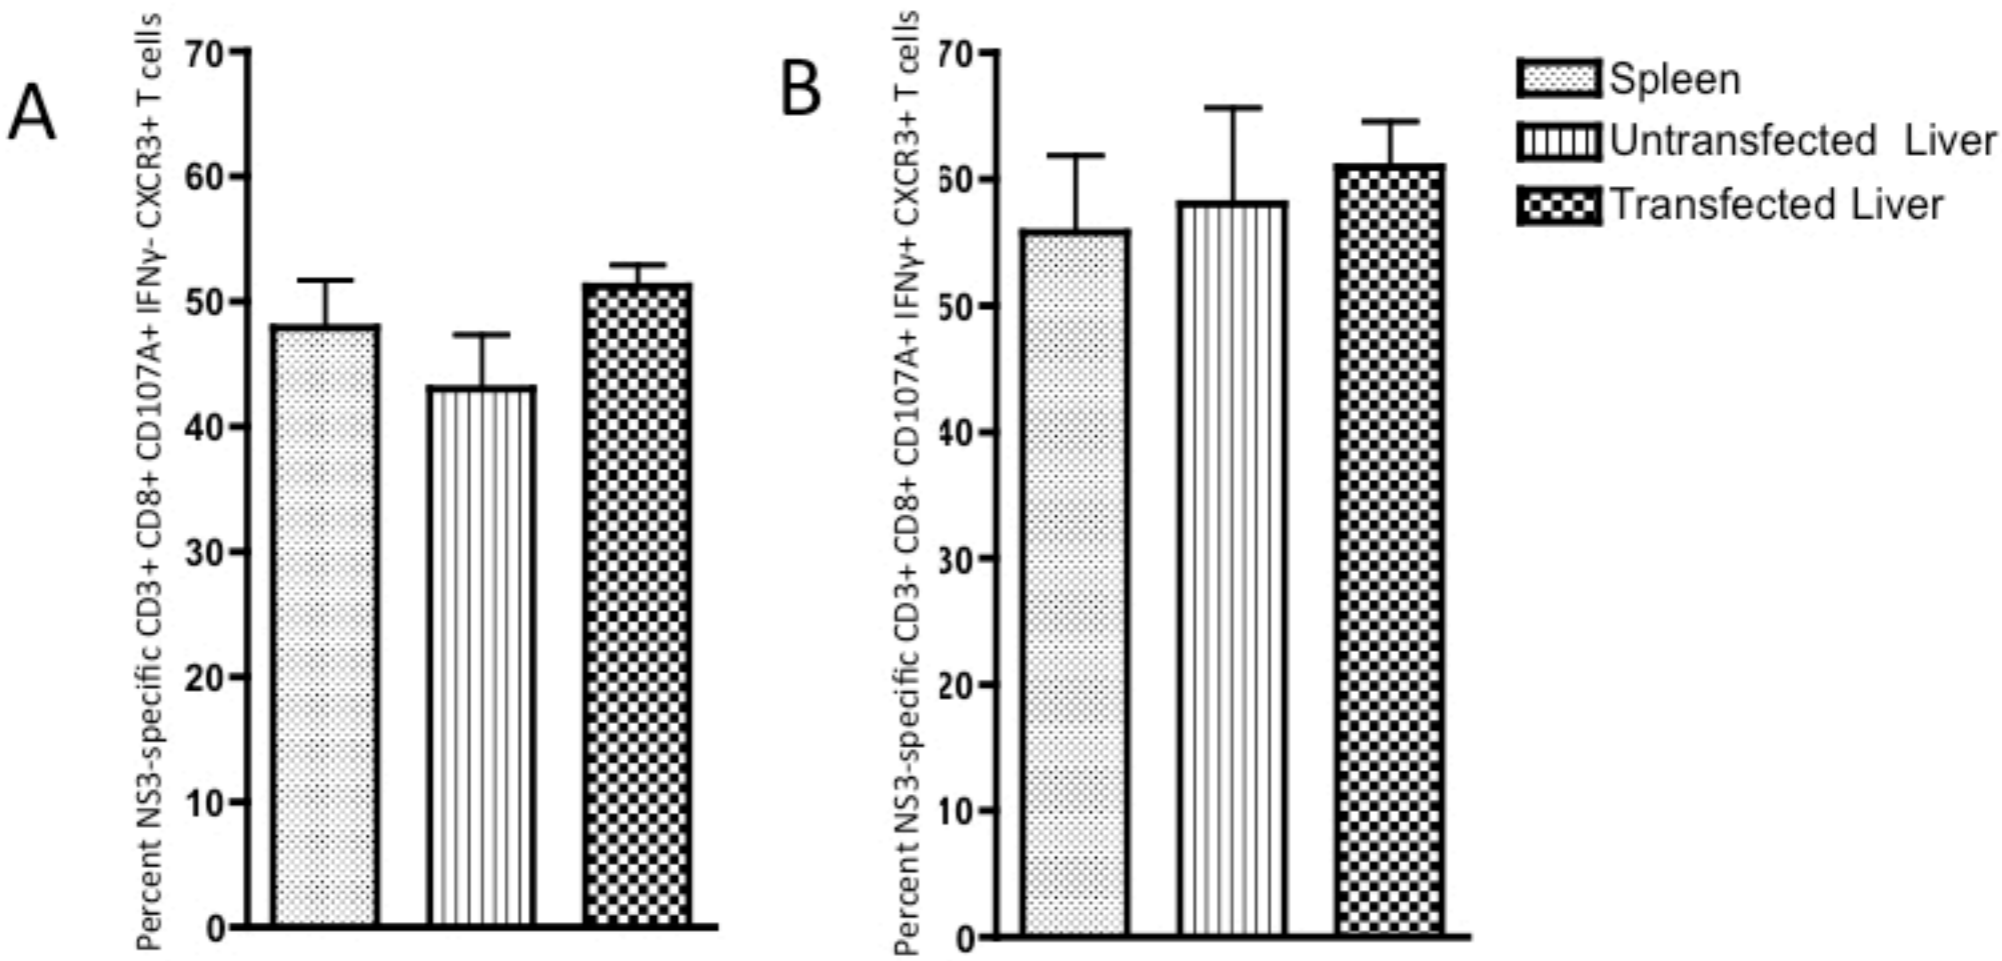

**Figure S3.** CXCR3+ expression on intrahepatic HCV NS3-specific CD8+ T cells following HCV NS3 transfection within the liver. Percentage of: A) CXCR3+ CD8+ CD107A+ IFN- $\gamma$ - B) CXCR3+ CD8+ CD107A+ IFN- $\gamma$ +. Significance was determined by Student's t-test (\*p < 0.05, \*\*p < 0.005 and \*\*\*p < 0.0005; NS, Not Significant). (n = 5)
